# Supplementary material for: Broad Spectral Response FeOOH/BiO2−x Photocatalyst with Efficient Charge Transfer for Enhanced Photo-Fenton Synergistic Catalytic Activity
Source: MDPI journal article supplement (doi:10.3390/molecules29040919), 2024-02-19
Supplement: s1 [file s1]

---

# Supplementary material

*for*

## **Broad spectral response FeOOH/BiO<sub>2-x</sub> photocatalyst with efficient charge transfer for enhanced photo-Fenton synergistic catalytic activity**

Pengfei Wu<sup>1,2</sup>, Yufei Qin<sup>2</sup>, Mengyuan Gao<sup>3</sup>, Rui Zheng<sup>2</sup>, Yixin Zhang<sup>2</sup>, Xinli Li<sup>2</sup>,  
Zhaolong Liu<sup>2,4</sup>, Yingkun Zhang<sup>4</sup>, Zhen Cao<sup>2,\*</sup>, Qingling Liu<sup>1,\*</sup>

<sup>1</sup>. Tianjin Key Lab of Indoor Air Environmental Quality Control, School of Environmental Science and Engineering, Tianjin University, Tianjin 300350, China;

<sup>2</sup>. Hebei Pollution Control Technology Innovation Center of Steel and Coking Industry, Department of Environmental and Chemical Engineering, Hebei Vocational University of Industry and Technology, Shijiazhuang 050091, China;

<sup>3</sup>. Hebei Provincial Academy of Ecological Environmental Science, Shijiazhuang 050030, China;

<sup>4</sup>. Hebei Key Lab of Environmental Photocatalytic and Electrocatalytic Materials, College of Chemical Engineering, North China University of Science and Technology, Tangshan 063210, China.

\*, Correspondence:

liuql@tju.edu.cn; Tel: +86-22-8740 1255;

caozhen81112@126.com; Tel: +86-311-8527 6051.

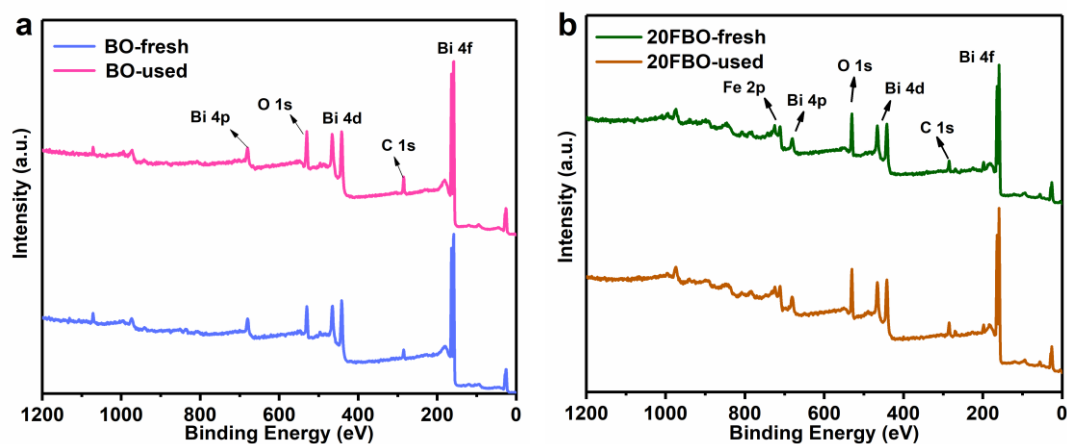

Figure S1. Full XPS spectrum of (a) BO and (b) 20FBO.

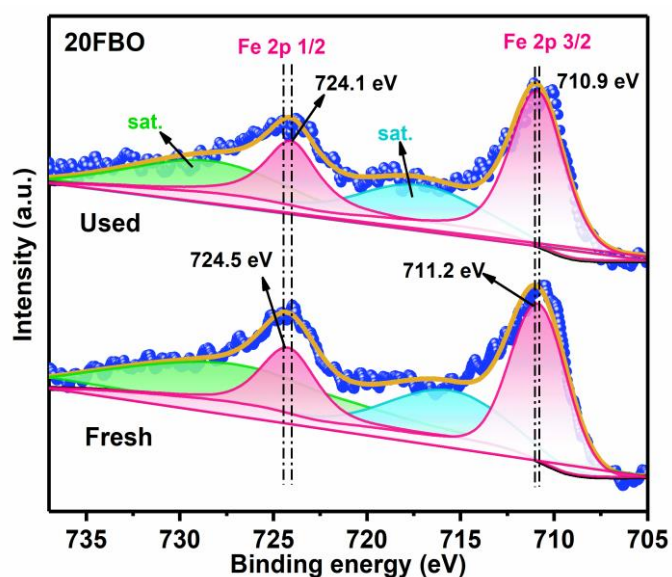

Figure S2. High-resolution XPS spectra of Fe 2p over 20FBO.

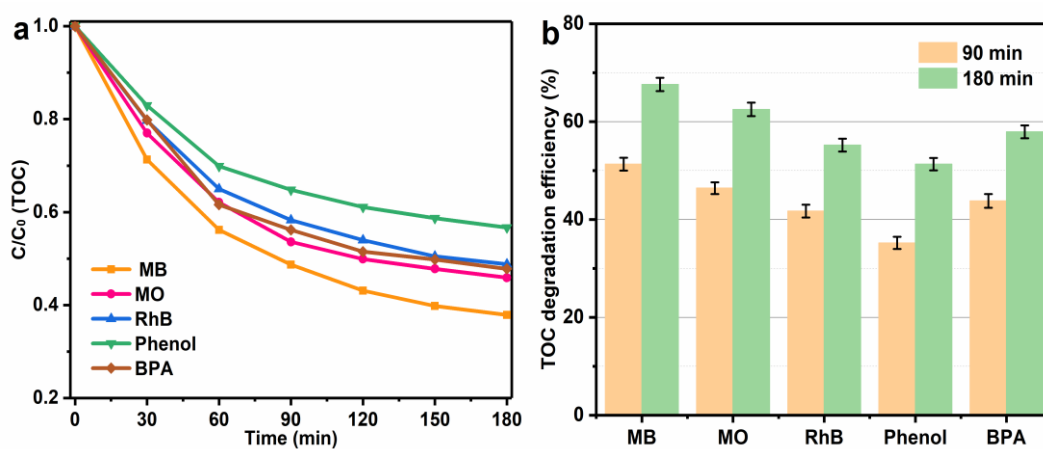

Figure S3 (a) Time profiles of TOC removal to different contaminants under photo-Fenton system; (b) Comparing the TOC removal efficiency of photo-Fenton system to different contaminants. (The yellow

bar graph represents the TOC removal rate of the system when the H<sub>2</sub>O<sub>2</sub> concentration is 8mM for 90 minutes. The green bar graph represents the removal rate of the same volume of H<sub>2</sub>O<sub>2</sub> added again after 90 minutes of reaction)

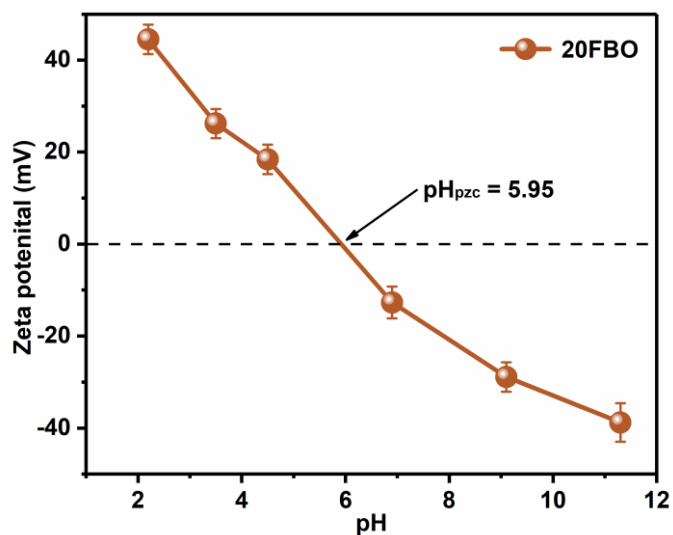

Figure S4. Zeta potentials of 20FBO suspensions with different pH values.

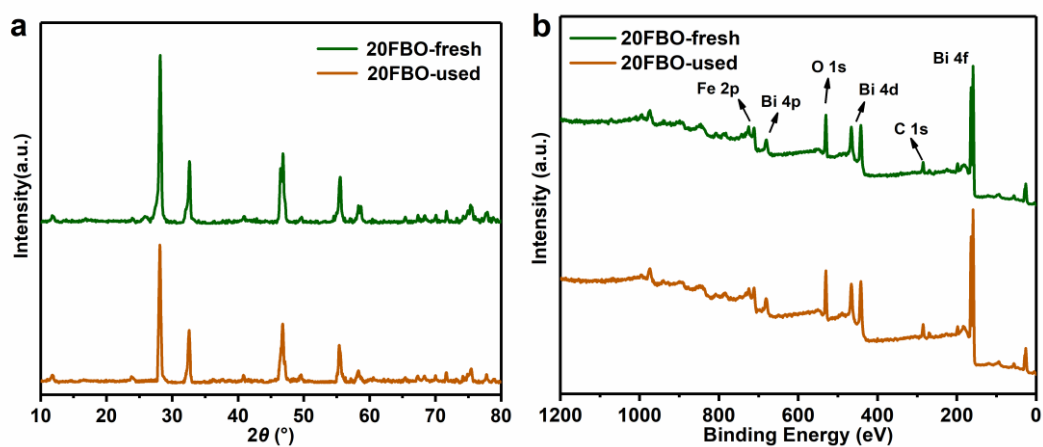

Figure S5. (a) XRD spectrum; (b) XPS spectrum of 20FBO before and after MB degradation.

Table S1 Comparison of degradation performance of MB using different photocatalysts

| Reaction system               |                            |                                           |                               |                      | reaction<br>time<br>(min) | Degradation<br>rate<br>(%) | reference |
|-------------------------------|----------------------------|-------------------------------------------|-------------------------------|----------------------|---------------------------|----------------------------|-----------|
| Catalysts                     | Catalyst<br>dosage<br>(mg) | H <sub>2</sub> O <sub>2</sub><br>(mmol/L) | MB<br>concentration<br>(mg/L) | MB<br>volume<br>(ml) |                           |                            |           |
| TiO <sub>2</sub> -rGO Sol-Gel | 20                         | /                                         | 5                             | 200                  | 120                       | 86                         | [67]      |

|                                                        |     |     |    |     |     |     |      |
|--------------------------------------------------------|-----|-----|----|-----|-----|-----|------|
| Fe <sub>3</sub> O <sub>4</sub> @void@CdS               | 10  | 300 | 10 | 50  | 20  | 100 | [68] |
| RGO/Fe <sub>3</sub> O <sub>4</sub>                     | 25  | 10  | 20 | 100 | 120 | 96  | [69] |
| CQDs/Bi <sub>2</sub> O <sub>2</sub> CO <sub>3</sub>    | 50  | /   | 10 | 50  | 120 | 94  | [70] |
| $\alpha$ -Fe <sub>2</sub> O <sub>3</sub> @GO           | 100 | 1.1 | 40 | 400 | 80  | 94  | [71] |
| Ag@AgCl/Bi <sub>2</sub> O <sub>2</sub> CO <sub>3</sub> | 400 | /   | 10 | 100 | 20  | 97  | [72] |

[67] S. Zhang, J. Xu, J. Hu, C. Cui, H. Liu, Interfacial Growth of TiO<sub>2</sub>-rGO Composite by Pickering Emulsion for Photocatalytic Degradation, *Langmuir*, 33 (2017) 5015-5024.

[68] W. Shi, D. Du, B. Shen, C. Cui, L. Lu, L. Wang, J. Zhang, Synthesis of Yolk-Shell Structured Fe<sub>3</sub>O<sub>4</sub>@void@CdS Nanoparticles: A General and Effective Structure Design for Photo-Fenton Reaction, *ACS applied materials & interfaces*, 8 (2016) 20831-20838.

[69] X. Jiang, L. Li, Y. Cui, F. Cui, New branch on old tree: Green-synthesized RGO/Fe<sub>3</sub>O<sub>4</sub> composite as a photo-Fenton catalyst for rapid decomposition of methylene blue, *Ceram. Int.*, 43 (2017) 14361-14368.

[70] Z. Zhang, S. Lin, X. Li, H. Li, T. Zhang, W. Cui, Enhanced Photocatalytic Activity toward Organic Pollutants Degradation and Mechanism Insight of Novel CQDs/Bi<sub>2</sub>O<sub>2</sub>CO<sub>3</sub> Composite, *Nanomaterials (Basel)*, 8 (2018).

[71] Y. Liu, W. Jin, Y. Zhao, G. Zhang, W. Zhang, Enhanced catalytic degradation of methylene blue by  $\alpha$ -Fe<sub>2</sub>O<sub>3</sub>/graphene oxide via heterogeneous photo-Fenton reactions, *Appl. Catal., B*, 206 (2017) 642-652.

[72] S. Lin, L. Liu, Y. Liang, W. Cui, Z. Zhang, Oil-in-Water Self-Assembled Synthesis of Ag@AgCl Nano-Particles on Flower-like Bi<sub>2</sub>O<sub>2</sub>CO<sub>3</sub> with Enhanced Visible-Light-Driven Photocatalytic Activity, *Materials (Basel)*, 9 (2016).
